# Supplementary material
Source: ML conference proceedings conference paper supplement (https://aclanthology.org/D19-1106)
Supplement: Attachment [file EMNLP2019_Crabb__Fabre_Pallier-13.pdf › EMNLP2019_Crabb__Fabre_Pallier-13.pdf]

# Supplementary Material: neuro-imaging data collection

**Benoît Crabbé**  
LLF - CNRS  
University of Paris - IUF  
Place Paul Ricoeur  
75013 Paris France  
benoit.crabbe@  
linguist.univ-paris-diderot.fr

**Murielle Popa-Fabre**  
ALMANACH - INRIA - LLF  
University of Paris  
2 rue Simone Iff  
75012 Paris France  
murielle.fabre@inria.fr

**Christophe Pallier**  
Cognitive Neuroimaging Lab  
INSERM-CEA  
Neurospin bat.145  
Gif-sur-Yvette France  
christophe@pallier.org

## 1 fMRI Data-set

### 1.1 Design & Methods

#### 1.1.1 The Little Prince

The analyzed text was the transcribed version of the English audio-book of Antoine de Saint-Exupéry *The Little Prince*, translated by David Wilkinson and read by Nadine Eckert-Boulet. This text comprises 19,171 tokens and 15,388 words, grouped in 1388 sentences.

#### 1.1.2 Participants

56 participants were scanned and 5 of them were excluded since they had incomplete scanning sessions. Participants included in this study were 50 volunteers (31 women, 18-37 years old, mean age = 21.3) with no history of psychiatric, neurological, medical illness or history of drug or alcohol abuse that might compromise cognitive functions. All strictly qualified as right-handed (Edinburgh handedness inventory Oldfield, 1971), self-identified as native English speakers, and gave their written informed consent prior to participation (Cornell University IRB guidelines).

#### 1.1.3 fMRI Design

Participants were familiarised with the MRI facility. Auditory stimuli were delivered through MRI-safe, high-fidelity headphones (Confon HP-VS01, MR Confon, Magdeburg, Germany) inside the head coil. The volume was adjusted until participants reported that they could hear clearly, using a spoken recitation of the US Constitution. Passive listening of the audio-book lasted 1 hour 38 minutes, divided into nine sections. To confirm participants' comprehension, the whole session (2.5 h) included a multiple-choice questionnaire with four questions (36 in total), concerning events and situations at the end of each section.

#### 1.1.4 fMRI-recording

Imaging was performed in a 3 Tesla MRI scanner (Discovery MR750 GE, Milwaukee, WI) with a 32-channel head coil at the Cornell MRI Facility. Blood Oxygen Level Dependent (BOLD) signal was collected using a T2-weighted echo planar imaging (EPI) sequence (repetition time: 2000 ms, echo time: 27 ms, flip angle: 77deg, image acceleration: 2X, field of view: 216x216 mm, matrix size 72x72, and 44 oblique slices, yielding 3 mm isotropic voxels). Anatomical images were collected at a high resolution (T1-weighted, 1x1x1 mm<sup>3</sup> voxel) with a Magnetization-Prepared RAPid Gradient-Echo (MP-RAGE) pulse sequence.

### 1.2 fMRI Analysis

#### 1.2.1 Preprocessing

First steps of preprocessing were carried out using AFNI (v.16 (Cox, 1996)) and FSL's Brain Extraction Tool (Jenkinson et al., 2012) for skull-stripping (0.5 fractional intensity). As fMRI data is acquired with physical, biological constraints, preprocessing allows to improve the signal-to-noise ratio. Specifically, Multi-echo independent components analysis (ME-ICA; (Kundu et al., 2013)) helped denoise data. Images were spatially normalized to the standard space of the Montreal Neurological Institute (MNI template), yielding volumetric time-series resampled at 2 mm isotropic voxels.

## References

R. W. Cox. 1996. AFNI: software for analysis and visualization of functional magnetic resonance neuroimages. *Computers and Biomedical Research, an International Journal*, 29(3):162–173.

Mark Jenkinson, Christian F Beckmann, Timothy EJ

Behrens, Mark W Woolrich, and Stephen M Smith. 2012. FSL. *Neuroimage*, 62(2):782–790.

Prantik Kundu, Noah D Brenowitz, Valerie Voon, Yulia Worbe, Petra E Vértes, Souheil J Inati, Ziad S Saad, Peter A Bandettini, and Edward T Bullmore. 2013. Integrated strategy for improving functional connectivity mapping using multiecho fMRI. *Proceedings of the National Academy of Sciences*, 110(40):16187–16192.
